# Supplementary material
Source: publisher figshare collection journal article supplement (https://acs.figshare.com/ndownloader/files/28496501)
Supplement: Supplementary file 1 [file 28496501]

***Supporting Information:***

**Enhancing the separation performance of Aqueous Phase Separation based  
membranes through polyelectrolyte multilayer coatings and interfacial  
polymerization**

*Muhammad Irshad Baig, Joshua D. Willott, Wiebe M. de Vos\**

*Membrane Science and Technology, MESA+ Institute for Nanotechnology, University of Twente,  
Faculty of Science and Technology, P.O. Box 217, 7500 AE Enschede, The Netherlands*

*\*Corresponding author: Email: [w.m.devos@utwente.nl](mailto:w.m.devos@utwente.nl)*

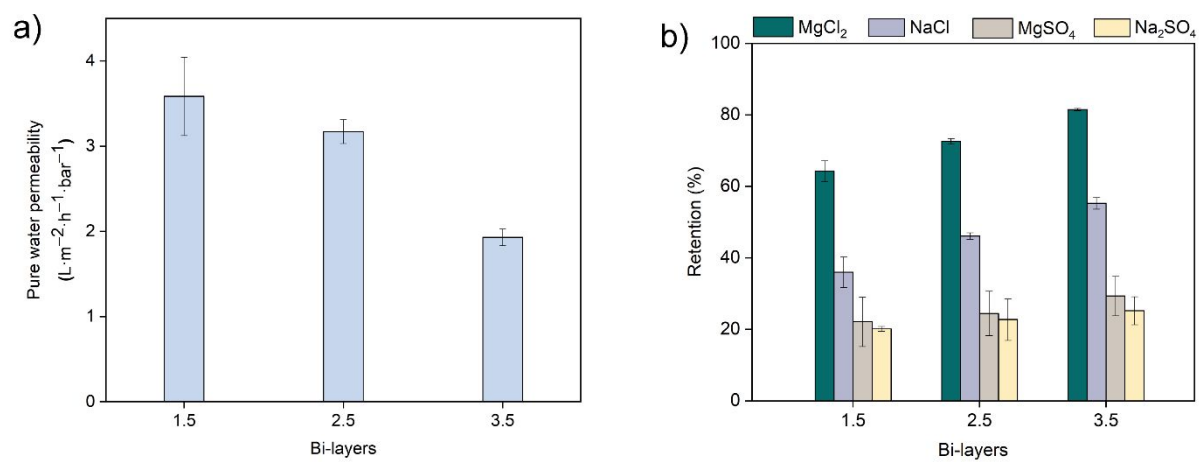

**Figure S1.** a) Pure water permeability and b) salt retentions of the PSS-PAH multilayer membranes showing the effect of number of bilayers on the membrane permeability and salt retentions.

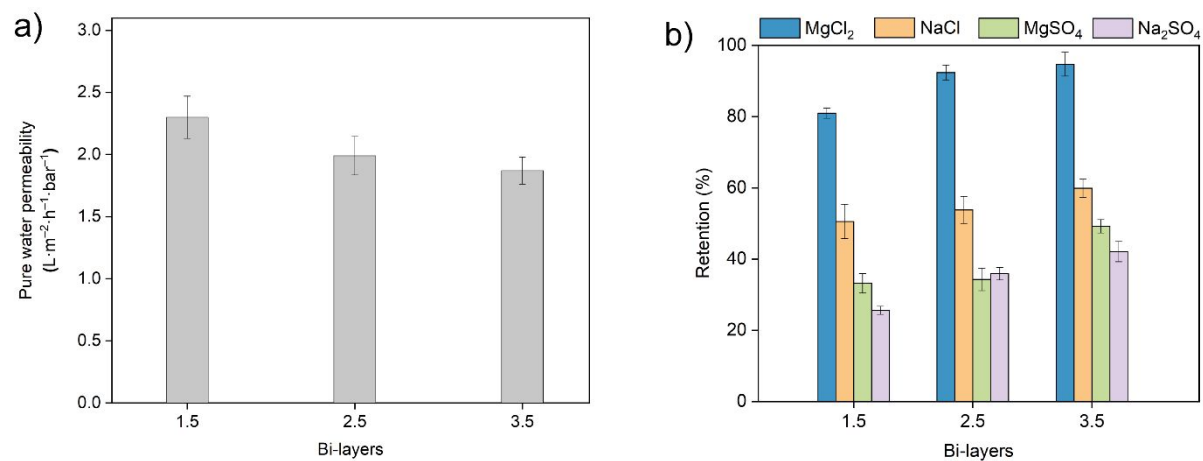

**Figure S2.** a) Pure water permeability and b) salt retentions of the PSS-PDADMAC multilayer membranes showing the effect of number of bilayers on the membrane permeability and separation performance.

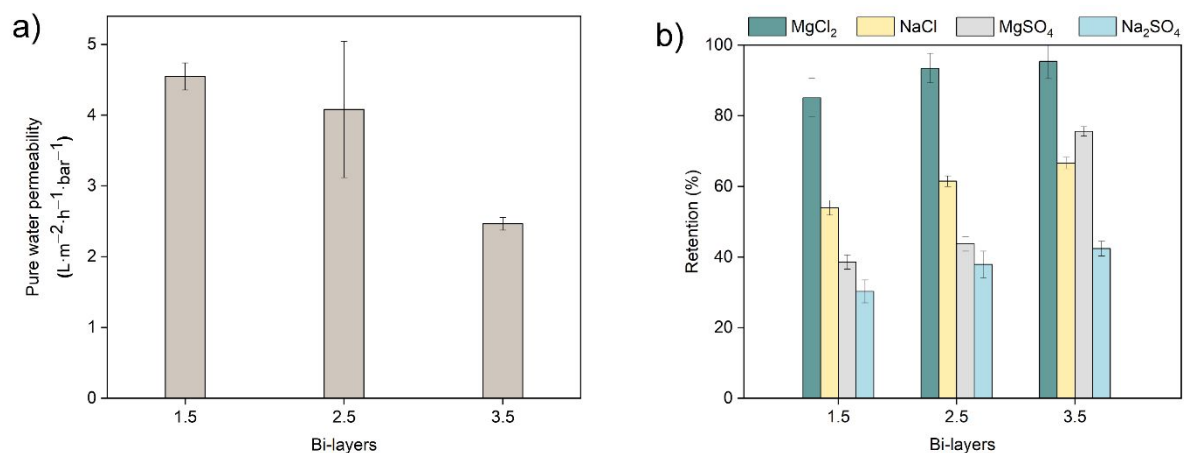

**Figure S3.** a) Pure water permeability and b) salt retentions of the PSS-PEI multilayer membranes showing the effect of number of bilayers on the membrane permeability and separation performance.

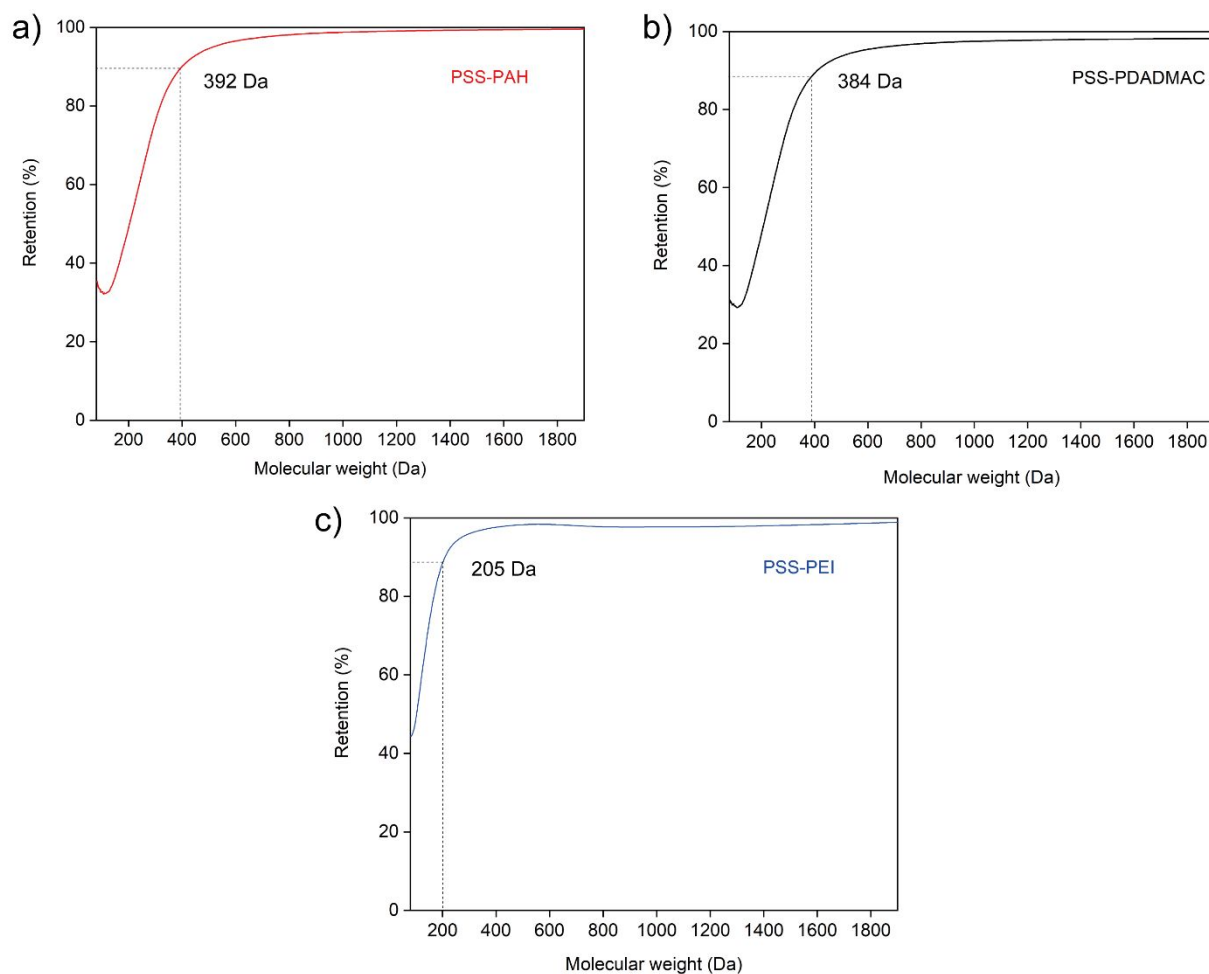

**Figure S4.** Sieving curves obtained by gel permeation chromatography showing the retention of Polyethylene glycol (PEG) as a function of its molecular weight for three types of multilayer coatings. a) PSS-PAH<sub>(4,5)</sub>, PSS-PDADMAC<sub>(4,5)</sub>, and PSS-PEI<sub>(4,5)</sub>. The molecular weight cut-off was estimated by taking the 90<sup>th</sup> percentile of the maximum retention obtained.

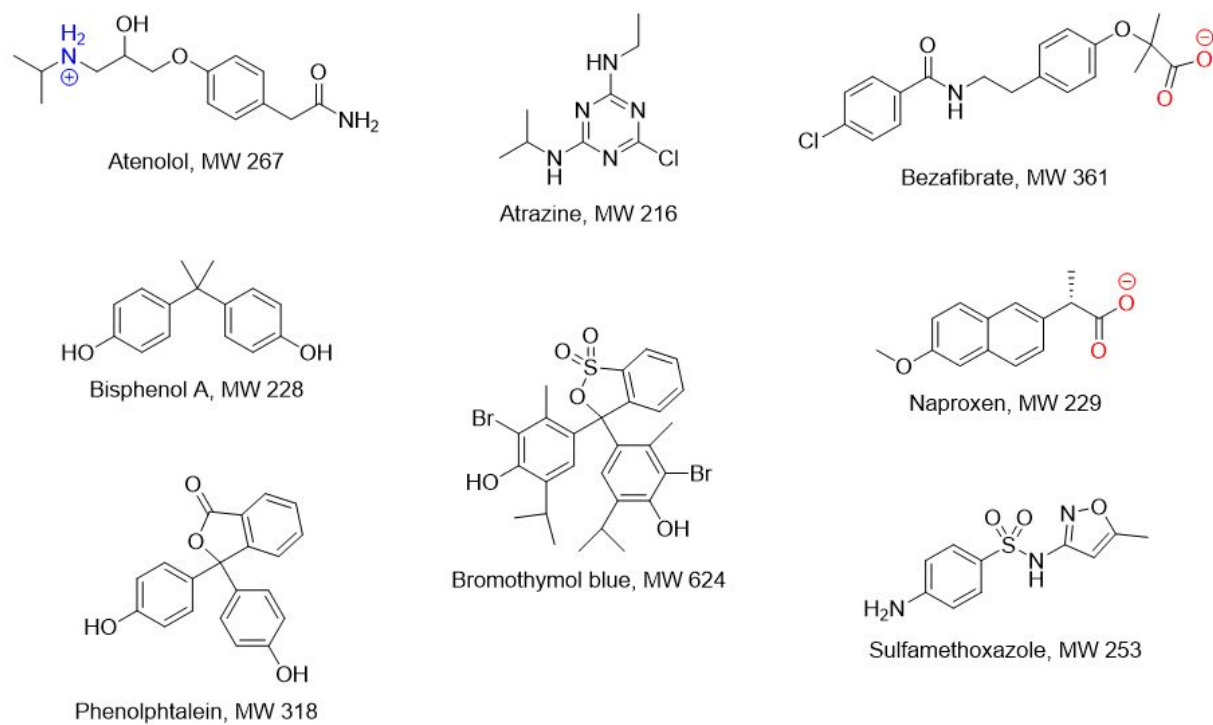

**Figure S5.** Chemical structures and molecular weights of the eight types of micropollutants used in this work.

**Table S1.** Comparison of pure water permeability and retention of NIPS based commercial membranes with APS membranes coated in this work.

| Membrane | Material          | Manufacturer | Pure water permeability<br>( $\text{L}\cdot\text{m}^{-2}\cdot\text{h}^{-1}\cdot\text{bar}^{-1}$ ) | NaCl retention<br>(%) | Reference                  |
|----------|-------------------|--------------|---------------------------------------------------------------------------------------------------|-----------------------|----------------------------|
| NF270    | Polyamide TFC     | Dow Filmtec  | 11                                                                                                | 80                    | Dang et al. <sup>1</sup>   |
| TFC-HR   | Polyamide TFC     | Koch         | 3.5                                                                                               | 99                    | Xu et al. <sup>2</sup>     |
| XLE      | Polyamide TFC     | Dow Filmtec  | 9                                                                                                 | 99                    | Xu et al. <sup>2</sup>     |
| SC-3100  | Cellulose acetate | Toray        | 1.3                                                                                               | 94                    | Kimura et al. <sup>3</sup> |
| NF90     | Polyamide TFC     | Dow Filmtec  | 6                                                                                                 | 93                    | Yüksel et al. <sup>4</sup> |
| Desal HL | Polyamide TFC     | GE osmonics  | 10.5                                                                                              | 55                    | Caus et al. <sup>5</sup>   |
| APS IP   | Polyamide TFC     | This work    | 1.1                                                                                               | 58                    | This work                  |
|          | PSS-PAH           | This work    | 1.7                                                                                               | 58                    | This work                  |
| APS PEM  | PSS-PDADMAC       | This work    | 1.7                                                                                               | 64                    | This work                  |
|          | PSS-PEI           | This work    | 1.4                                                                                               | 70                    | This work                  |

## References

- (1) Dang, H. Q.; Price, W. E.; Nghiem, L. D. The Effects of Feed Solution Temperature on Pore Size and Trace Organic Contaminant Rejection by the Nanofiltration Membrane NF270. *Sep. Purif. Technol.* **2014**, *125*, 43–51.
- (2) Xu, P.; Drewes, J. E.; Bellona, C.; Amy, G.; Kim, T.-U.; Adam, M.; Heberer, T. Rejection of Emerging Organic Micropollutants in Nanofiltration-Reverse Osmosis Membrane Applications. *Water Environ. Res. a Res. Publ. Water Environ. Fed.* **2005**, *77* (1), 40–48.
- (3) Kimura, K.; Toshima, S.; Amy, G.; Watanabe, Y. Rejection of Neutral Endocrine Disrupting Compounds (EDCs) and Pharmaceutical Active Compounds (PhACs) by RO Membranes. *J. Memb. Sci.* **2004**, *245* (1), 71–78.
- (4) Yüksel, S.; Kabay, N.; Yüksel, M. Removal of Bisphenol A (BPA) from Water by Various Nanofiltration (NF) and Reverse Osmosis (RO) Membranes. *J. Hazard. Mater.* **2013**, *263*, 307–310.
- (5) Caus, A.; Vanderhaegen, S.; Braeken, L.; Van der Bruggen, B. Integrated Nanofiltration Cascades with Low Salt Rejection for Complete Removal of Pesticides in Drinking Water Production. *Desalination* **2009**, *241* (1–3), 111–117.
